# Supplementary material for: Self-assembly of layered double hydroxide nanosheets/Au nanoparticles ultrathin films for enzyme-free electrocatalysis of glucose
Source: Royal Society of Chemistry journal article supplement (doi:10.1039/c1jm12060c), 2011-01-01
Supplement: c1jm12060c.pdf [file c1jm12060c.pdf]

**Supporting Information for**  
**Self-assembly of layered double hydroxide nanosheets/Au**  
**nanoparticles ultrathin films for enzyme-free electrocatalysis of glucose**

**Jingwen Zhao, Xianggui Kong, Wenying Shi, Mingfei Shao, Jingbin Han, Min Wei,\***

**David G. Evans, Xue Duan**

*State Key Laboratory of Chemical Resource Engineering, Beijing University of Chemical  
Technology, Beijing 100029, P. R. China*

\* Corresponding author. Tel: +86-10-64412131; Fax: +86-10-64425385.

E-mail address: [weimin@mail.buct.edu.cn](mailto:weimin@mail.buct.edu.cn)

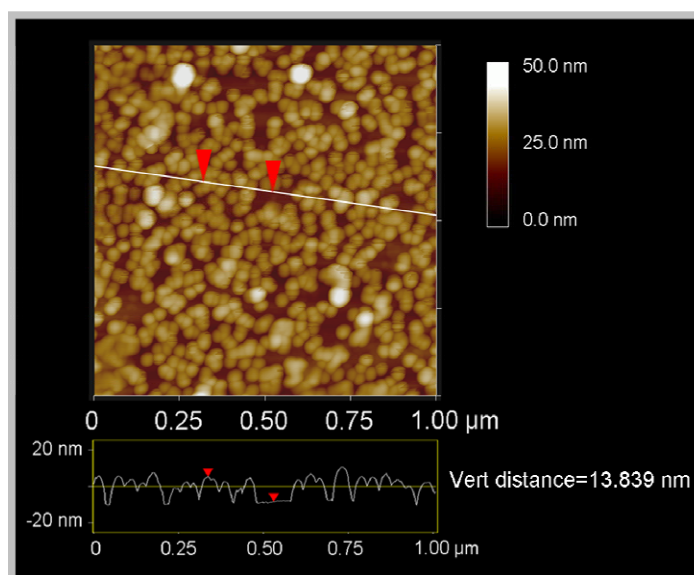

**Figure S1.** Tapping-mode AFM image of the as-prepared AuNPs deposited on a Si wafer substrate, with a height profile measurement along the marked white line.

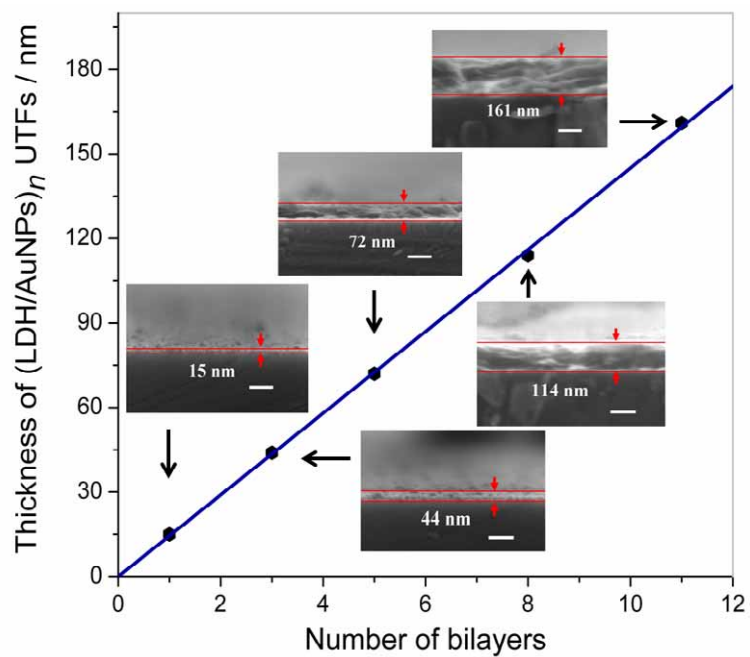

**Figure S2.** Thickness of the  $(\text{LDH}/\text{AuNPs})_n$  UTFs as a function of  $n$ ; the insets show the cross-sectional view of SEM images. Scale bar: 100 nm.

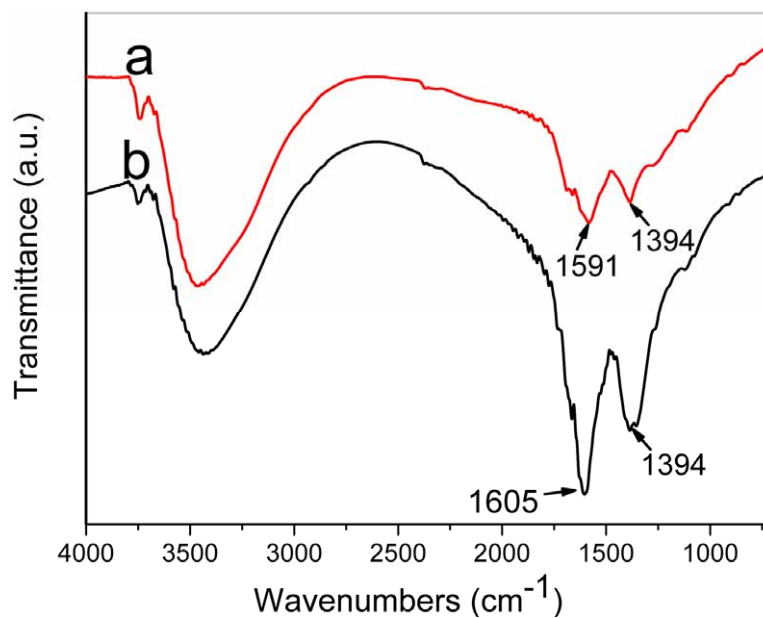

**Figure S3.** (ATR) FTIR spectra of (a) the citric-capped AuNPs and (b) the  $(\text{LDH}/\text{AuNPs})_8$  UTF.

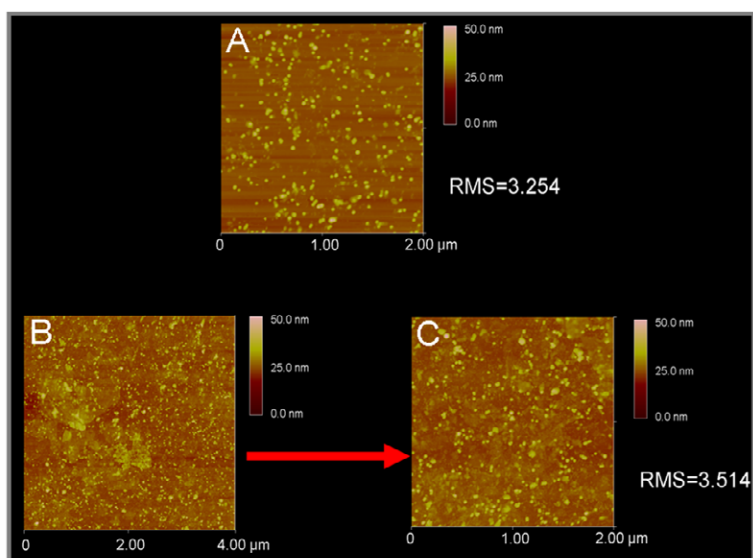

**Figure S4.** Tapping-mode AFM images of (A) the  $(\text{LDH}/\text{AuNPs})_1$  UTF, the  $\text{LDH}/\text{AuNPs}/\text{LDH}$  UTF at low magnification (B) and high magnification (C).

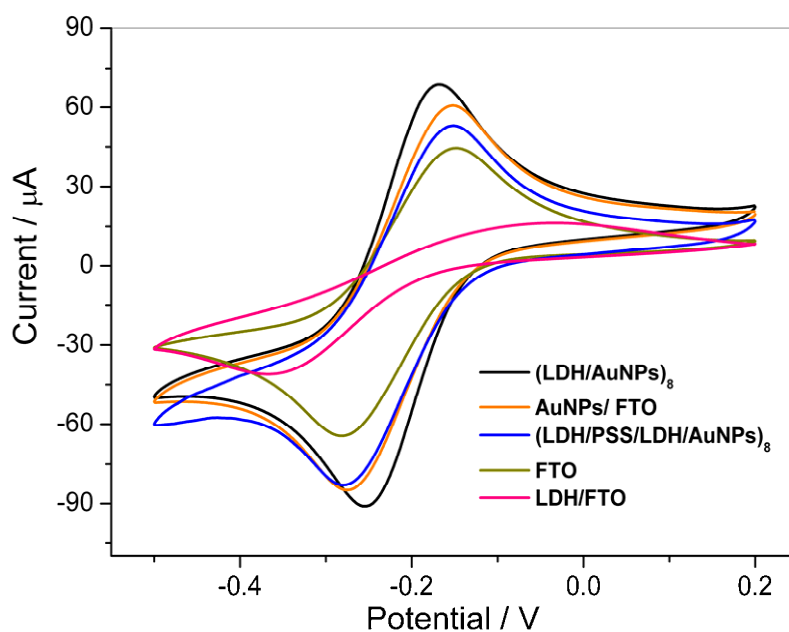

**Figure S5.** Cyclic voltammograms of bare FTO, LDH/FTO, AuNPs/FTO,  $(\text{LDH}/\text{PSS}/\text{LDH}/\text{AuNPs})_8/\text{FTO}$  and  $(\text{LDH}/\text{AuNPs})_8/\text{FTO}$  electrode in 0.1 M  $\text{KNO}_3$  solution containing 1 mM  $\text{Ru}(\text{NH}_3)_6^{3+}$  at a scan rate of  $20 \text{ mV s}^{-1}$ .

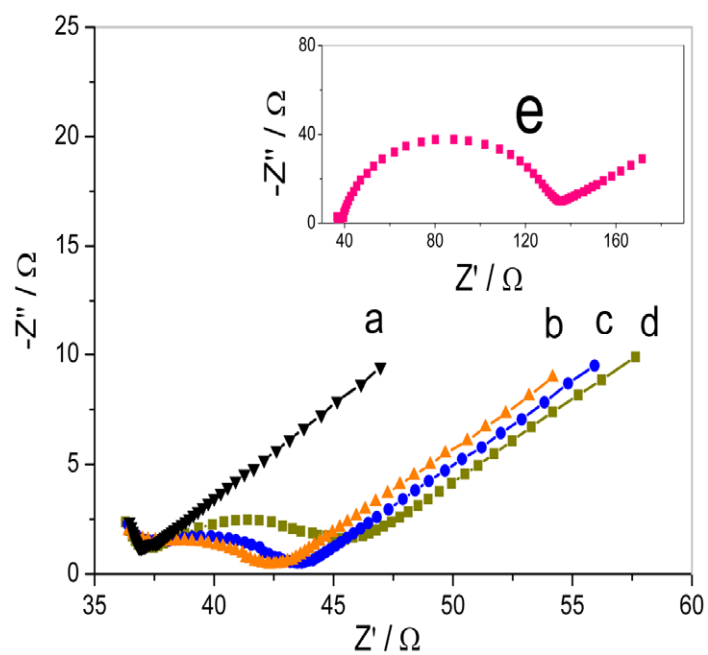

**Figure S6.** Nyquist plots of EIS for the (a) (LDH/AuNPs)<sub>8</sub>/FTO, (b) AuNPs/FTO, (c) (LDH/PSS/LDH/AuNPs)<sub>8</sub>/FTO, (d) bare FTO and (e) LDH/FTO in 0.1 M KNO<sub>3</sub> solution containing 1 mM Ru(NH<sub>3</sub>)<sub>6</sub><sup>3+/2+</sup> at a potential of -0.20 V vs. Ag/AgCl.
